# Supplementary material for: The Ear Unwrapper: A Maize Ear Image Acquisition Pipeline for Disease Severity Phenotyping
Source: MDPI journal article supplement (doi:10.3390/agriengineering5030077), 2023-07-04
Supplement: s1 [file s1]

Archive with 2 entries (2 files):
- Supplemental Figures S1 and S2.pdf
- Supplementary Table S1.csv
