# Supplementary material for: The Ear Unwrapper: A Maize Ear Image Acquisition Pipeline for Disease Severity Phenotyping
Source: MDPI journal article supplement (doi:10.3390/agriengineering5030077), 2023-07-04
Supplement: s1 [file s1 › Supplemental Figures S1 and S2.pdf]

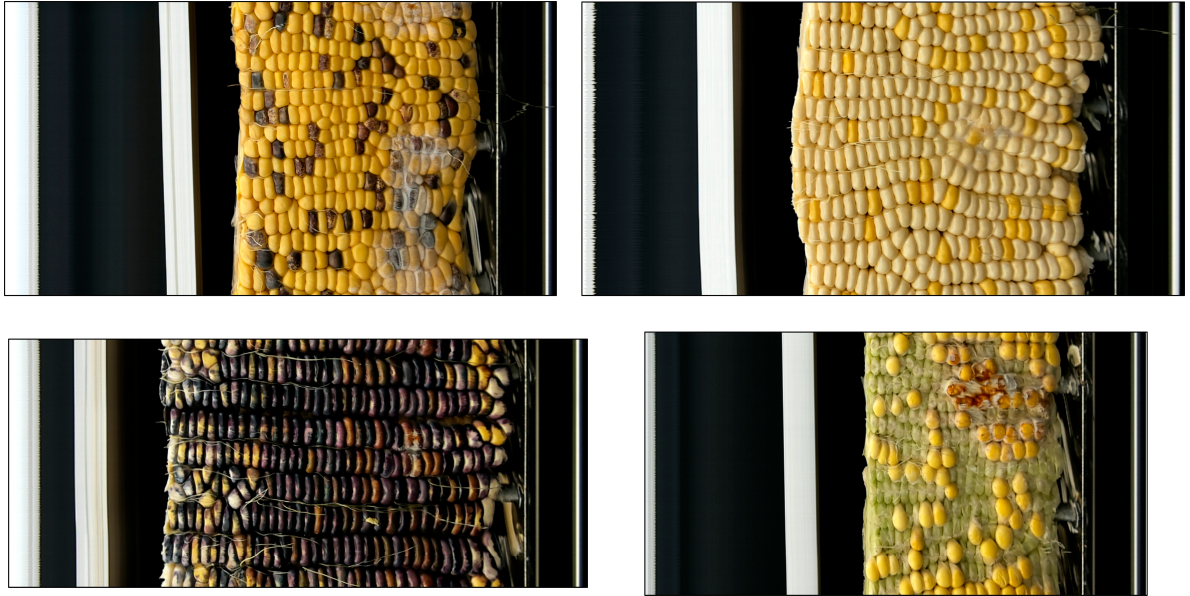

**Supplemental Figure S1.** Examples of morphologically diverse maize sample images produced by The Ear Unwrapper.

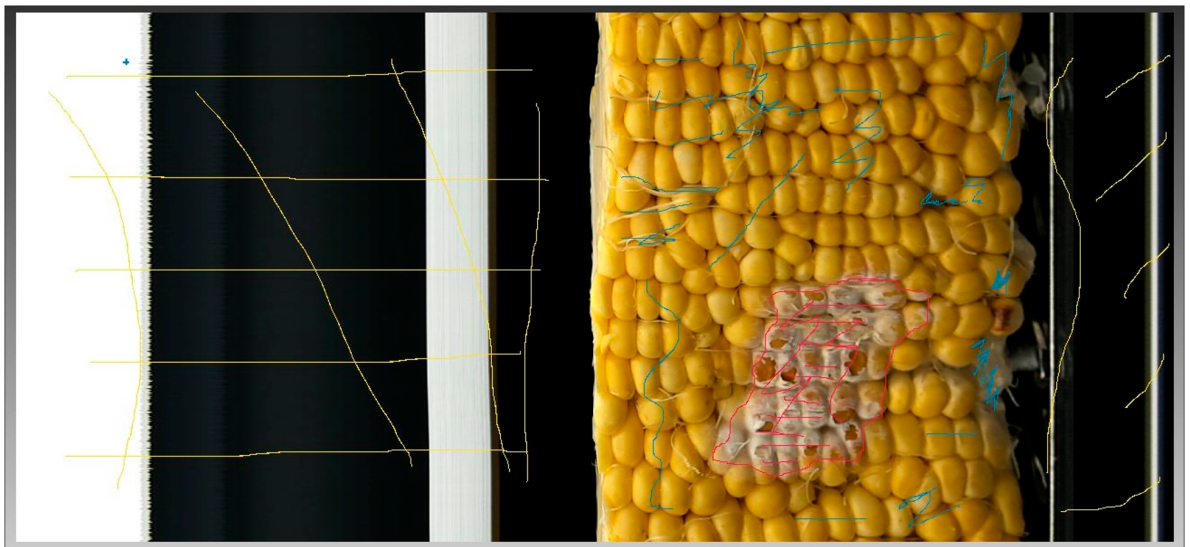

**Supplemental Figure S2.** Example of annotation in Ilastik. Yellow lines are drawn on the background. Blue lines are drawn on healthy tissue, and red lines are drawn on diseased tissue.
