# Supplementary material for: The Ear Unwrapper: A Maize Ear Image Acquisition Pipeline for Disease Severity Phenotyping
Source: MDPI journal article supplement (doi:10.3390/agriengineering5030077), 2023-07-04
Supplement: s1 [file s1 › Supplementary Table S1.csv]

corn_id	method	score
ID_575	log_ilastik	4.058729621
ID_575	log_paint	3.962321973
ID_575	Log_kernel_count	1.447158031
ID_593	log_ilastik	4.491571786
ID_593	log_paint	4.282304828
ID_593	Log_kernel_count	1.462397998
ID_655	log_ilastik	4.24674471
ID_655	log_paint	4.282304828
ID_655	Log_kernel_count	1.447158031
ID_657	log_ilastik	4.376759395
ID_657	log_paint	4.170349739
ID_657	Log_kernel_count	1.431363764
ID_658	log_ilastik	4.281669563
ID_658	log_paint	4.207876622
ID_658	Log_kernel_count	1.505149978
ID_760	log_ilastik	3.890867939
ID_760	log_paint	3.812913357
ID_760	Log_kernel_count	1.204119983
ID_952	log_ilastik	3.912328358
ID_952	log_paint	4.017742664
ID_952	Log_kernel_count	1.342422681
ID_953	log_ilastik	4.09233459
ID_953	log_paint	3.950997334
ID_953	Log_kernel_count	1.462397998
ID_955	log_ilastik	4.346313847
ID_955	log_paint	4.215187969
ID_955	Log_kernel_count	1.662757832
ID_1246	log_ilastik	3.848989206
ID_1246	log_paint	3.768638101
ID_1246	Log_kernel_count	1.447158031
ID_1268	log_ilastik	4.019282496
ID_1268	log_paint	3.961563462
ID_1268	Log_kernel_count	1.462397998
ID_1537	log_ilastik	4.065803713
ID_1537	log_paint	4.052501563
ID_1537	Log_kernel_count	1.414973348
ID_1672	log_ilastik	4.217115296
ID_1672	log_paint	3.903035697
ID_1672	Log_kernel_count	1.230448921
ID_1831	log_ilastik	3.250175948
ID_1831	log_paint	4.141794564
ID_1831	Log_kernel_count	1.832508913
ID_1833	log_ilastik	2.88592634
ID_1833	log_paint	3.625312451
ID_1833	Log_kernel_count	1.69019608
ID_1834	log_ilastik	4.16835014
ID_1834	log_paint	4.087994255
ID_1834	Log_kernel_count	1.740362689
ID_1835	log_ilastik	3.764624398
ID_1835	log_paint	3.740915076
ID_1835	Log_kernel_count	1.462397998
ID_1838	log_ilastik	3.799891685
ID_1838	log_paint	3.791620483
ID_1838	Log_kernel_count	1.591064607
ID_1840	log_ilastik	4.110320297
ID_1840	log_paint	4.165837625
ID_1840	Log_kernel_count	1.672097858
ID_1842	log_ilastik	3.940167714
ID_1842	log_paint	4.118562313
ID_1842	Log_kernel_count	1.819543936
ID_1843	log_ilastik	3.595606435
ID_1843	log_paint	4.081779227
ID_1843	Log_kernel_count	1.838849091
ID_1844	log_ilastik	3.836640542
ID_1844	log_paint	4.031448862
ID_1844	Log_kernel_count	1.62324929
ID_1845	log_ilastik	3.24723655
ID_1845	log_paint	3.73239376
ID_1845	Log_kernel_count	1.62324929
ID_1846	log_ilastik	3.288249226
ID_1846	log_paint	4.013763855
ID_1846	Log_kernel_count	1.380211242
ID_1847	log_ilastik	2.958085849
ID_1847	log_paint	3.638788667
ID_1847	Log_kernel_count	1.477121255
ID_1848	log_ilastik	3.772834927
ID_1848	log_paint	3.780893109
ID_1848	Log_kernel_count	1.531478917
ID_1849	log_ilastik	3.50501424
ID_1849	log_paint	4.00548081
ID_1849	Log_kernel_count	1.740362689
ID_1856	log_ilastik	4.284001868
ID_1856	log_paint	4.161697342
ID_1856	Log_kernel_count	1.77815125
ID_1881	log_ilastik	4.301767669
ID_1881	log_paint	4.191842095
ID_1881	Log_kernel_count	1.531478917
ID_1910	log_ilastik	4.378288859
ID_1910	log_paint	4.236990465
ID_1910	Log_kernel_count	1.544068044
ID_1911	log_ilastik	4.371732655
ID_1911	log_paint	4.138302698
ID_1911	Log_kernel_count	1.397940009
ID_1913	log_ilastik	4.480825865
ID_1913	log_paint	4.341315795
ID_1913	Log_kernel_count	1.544068044
ID_2194	log_ilastik	3.126780577
ID_2194	log_paint	3.05804623
ID_2194	Log_kernel_count	1.397940009
ID_2195	log_ilastik	2.884795364
ID_2195	log_paint	2.915399835
ID_2195	Log_kernel_count	1.278753601
ID_2197	log_ilastik	3.638289535
ID_2197	log_paint	3.447623098
ID_2197	Log_kernel_count	1.322219295
ID_2202	log_ilastik	0.77815125
ID_2202	log_paint	2.818885415
ID_2202	Log_kernel_count	0.84509804
ID_2203	log_ilastik	3.19838213
ID_2203	log_paint	3.310268367
ID_2203	Log_kernel_count	1.176091259
ID_2207	log_ilastik	3.611085733
ID_2207	log_paint	3.395151592
ID_2207	Log_kernel_count	1.146128036
ID_2208	log_ilastik	3.375114685
ID_2208	log_paint	3.502973059
ID_2208	Log_kernel_count	1.301029996
ID_2209	log_ilastik	3.376941757
ID_2209	log_paint	3.351603072
ID_2209	Log_kernel_count	1.342422681
ID_2211	log_ilastik	3.347134783
ID_2211	log_paint	3.33725954
ID_2211	Log_kernel_count	1.146128036
ID_2215	log_ilastik	4.111396949
ID_2215	log_paint	3.986771734
ID_2215	Log_kernel_count	1.342422681
ID_2286	log_ilastik	3.871981354
ID_2286	log_paint	3.733357788
ID_2286	Log_kernel_count	1.591064607
ID_2311	log_ilastik	4.523134903
ID_2311	log_paint	4.18235758
ID_2311	Log_kernel_count	1.903089987
ID_2313	log_ilastik	4.40014064
ID_2313	log_paint	4.271190839
ID_2313	Log_kernel_count	1.77815125
ID_2418	log_ilastik	4.140004951
ID_2418	log_paint	4.038699623
ID_2418	Log_kernel_count	1.633468456
ID_2440	log_ilastik	4.615844883
ID_2440	log_paint	4.373353434
ID_2440	Log_kernel_count	1.748188027
ID_2642	log_ilastik	2.996073654
ID_2642	log_paint	3.392345155
ID_2642	Log_kernel_count	1.146128036
ID_2652	log_ilastik	2.482873584
ID_2652	log_paint	3.357363031
ID_2652	Log_kernel_count	1.146128036
